# Supplementary material for: Global Patterns of Prostate Cancer Incidence, Aggressiveness, and Mortality in Men of African Descent
Source: Hindawi journal article supplement (doi:10.1155/2013/560857), 2013-01-01
Supplement: f1 [file 560857.f1.pdf]

**Supplementary Table 1: CaP Incidence Data in Men of African Descent Reported in Figures.**  
**All data are age-standardized to the 1960 world population.**

| <b>Region</b> | <b>Location</b>          | <b>Year(s)</b> | <b>Age-Standardized Incidence per 100,000</b> | <b>Source</b> | <b>Population of African Descent (%)<sup>a</sup></b> | <b>Reference</b> |
|---------------|--------------------------|----------------|-----------------------------------------------|---------------|------------------------------------------------------|------------------|
| Africa        | Angola                   | 2008           | 19.7                                          | GLOBOCAN      | 99                                                   | [4]              |
|               | Benin                    | 2008           | 16.0                                          | GLOBOCAN      | 99                                                   | [4]              |
|               | Botswana                 | 2008           | 8.9                                           | GLOBOCAN      | NA                                                   | [4]              |
|               | Burkina Faso             | 2008           | 18.3                                          | GLOBOCAN      | NA                                                   | [4]              |
|               | Burundi                  | 2008           | 18.6                                          | GLOBOCAN      | >99                                                  | [4]              |
|               | Cameroon                 | 2008           | 19.2                                          | GLOBOCAN      | >99                                                  | [4]              |
|               | Cape Verde               | 2008           | 18.8                                          | GLOBOCAN      | 99                                                   | [4]              |
|               | Central African Republic | 2008           | 16.3                                          | GLOBOCAN      | >98                                                  | [4]              |
|               | Chad                     | 2008           | 14.0                                          | GLOBOCAN      | >94                                                  | [4]              |
|               | D.R. Congo               | 2008           | 14.3                                          | GLOBOCAN      | NA                                                   | [4]              |
|               | Rep. Congo               | 2008           | 21.0                                          | GLOBOCAN      | 97                                                   | [4]              |
|               | Cote d'Ivoire            | 2008           | 34.8                                          | GLOBOCAN      | 97                                                   | [4]              |
|               | Djibouti                 | 2008           | 7.1                                           | GLOBOCAN      | >95                                                  | [4]              |
|               | Equatorial Guinea        | 2008           | 18.9                                          | GLOBOCAN      | >98                                                  | [4]              |
|               | Eritrea                  | 2008           | 7.8                                           | GLOBOCAN      | >99                                                  | [4]              |
|               | Ethiopia                 | 2008           | 6.3                                           | GLOBOCAN      | >89                                                  | [4]              |
|               | Gabon                    | 2008           | 18.2                                          | GLOBOCAN      | NA                                                   | [4]              |
|               | Ghana                    | 2008           | 20.4                                          | GLOBOCAN      | >92                                                  | [4]              |
|               | Guinea                   | 2008           | 20.1                                          | GLOBOCAN      | NA                                                   | [4]              |
|               | Guinea-Bissau            | 2008           | 17.9                                          | GLOBOCAN      | >99                                                  | [4]              |
|               | Kenya                    | 2008           | 15.2                                          | GLOBOCAN      | 99                                                   | [4]              |
|               | Lesotho                  | 2008           | 11.1                                          | GLOBOCAN      | >99                                                  | [4]              |
|               | Liberia                  | 2008           | 27.5                                          | GLOBOCAN      | NA                                                   | [4]              |
|               | Madagascar               | 2008           | 21.8                                          | GLOBOCAN      | NA                                                   | [4]              |
|               | Malawi                   | 2008           | 13.5                                          | GLOBOCAN      | >97                                                  | [4]              |
|               | Mali                     | 2008           | 13.1                                          | GLOBOCAN      | >95                                                  | [4]              |
|               | Mauritania               | 2008           | 17.9                                          | GLOBOCAN      | NA                                                   | [4]              |
|               | Mozambique               | 2008           | 16.1                                          | GLOBOCAN      | >99                                                  | [4]              |
|               | Namibia                  | 2008           | 14.8                                          | GLOBOCAN      | 94                                                   | [4]              |
|               | Niger                    | 2008           | 5.1                                           | GLOBOCAN      | >99                                                  | [4]              |
|               | Nigeria                  | 2008           | 22.7                                          | GLOBOCAN      | NA                                                   | [4]              |
|               | Rwanda                   | 2008           | 16.2                                          | GLOBOCAN      | NA                                                   | [4]              |
|               | Senegal                  | 2008           | 18.1                                          | GLOBOCAN      | 99                                                   | [4]              |
|               | Sierra Leone             | 2008           | 27.3                                          | GLOBOCAN      | NA                                                   | [4]              |
|               | Somalia                  | 2008           | 8.9                                           | GLOBOCAN      | >99                                                  | [4]              |
|               | South Africa             | 2008           | 59.7                                          | GLOBOCAN      | 88                                                   | [4]              |
|               | Sudan                    | 2008           | 9.0                                           | GLOBOCAN      | >97                                                  | [4]              |
|               | Swaziland                | 2008           | 17.6                                          | GLOBOCAN      | 97                                                   | [4]              |
|               | Tanzania                 | 2008           | 8.8                                           | GLOBOCAN      | 99                                                   | [4]              |
|               | The Gambia               | 2008           | 5.4                                           | GLOBOCAN      | 99                                                   | [4]              |
|               | Togo                     | 2008           | 28.8                                          | GLOBOCAN      | >99                                                  | [4]              |
|               | Uganda                   | 2008           | 28.7                                          | GLOBOCAN      | NA                                                   | [4]              |
|               | Uganda (Kampala)         | 1989-1991      | 12.3                                          | Registry      | NA                                                   | [53]             |

| Region    | Location                    | Year(s)   | Age-Standardized Incidence per 100,000 | Source   | Population of African Descent (%) <sup>a</sup> | Reference |
|-----------|-----------------------------|-----------|----------------------------------------|----------|------------------------------------------------|-----------|
|           | Uganda (Kampala)            | 1991-1995 | 25.7                                   | Registry | NA                                             | [54]      |
|           | Uganda (Kampala)            | 1996-2001 | 41.2                                   | Registry | NA                                             | [54]      |
|           | Uganda (Kampala)            | 2002-2006 | 39.6                                   | Registry | NA                                             | [54]      |
|           | Uganda (Kyadondo)           | 1991-1994 | 26.3                                   | Registry | NA                                             | [55]      |
|           | Uganda (Kyadondo)           | 1995-1997 | 39.2                                   | Registry | NA                                             | [55]      |
|           | Zambia                      | 2008      | 30.0                                   | GLOBOCAN | >99                                            | [42]      |
|           | Zimbabwe                    | 2008      | 26.0                                   | GLOBOCAN | >98                                            | [42]      |
|           | Zimbabwe - Harare (African) | 1990-1992 | 28.1                                   | Registry | >98                                            | [56]      |
|           | Zimbabwe - Harare (African) | 1993-1995 | 26.0                                   | Registry | >98                                            | [56]      |
|           | Zimbabwe - Harare (African) | 1994-1997 | 28.5                                   | Registry | >98                                            | [57]      |
| Caribbean | Bahamas                     | 2008      | 78.5                                   | GLOBOCAN | 85                                             | [4]       |
|           | Barbados                    | 2008      | 140.0                                  | GLOBOCAN | 96                                             | [4]       |
|           | Dominican Republic          | 2008      | 68.8                                   | GLOBOCAN | 84                                             | [4]       |
|           | Guadeloupe                  | 2008      | 108.2                                  | GLOBOCAN | NA                                             | [4]       |
|           | Haiti                       | 2008      | 78.4                                   | GLOBOCAN | >95                                            | [4]       |
|           | Jamaica                     | 2008      | 51.1                                   | GLOBOCAN | >97                                            | [4]       |
|           | Martinique                  | 2008      | 173.7                                  | GLOBOCAN | NA                                             | [4]       |
|           | Trinidad and Tobago         | 2008      | 89.4                                   | GLOBOCAN | >58                                            | [4]       |
| US        | Atlanta                     | 2008      | 198.8                                  | SEER-17  | b                                              | [15, 58]  |
|           | California ex. SF/SJ/LA     | 2008      | 145.2                                  | SEER-17  | b                                              | [15, 58]  |
|           | Connecticut                 | 2008      | 161.2                                  | SEER-17  | b                                              | [15, 58]  |
|           | Detroit                     | 2008      | 179.8                                  | SEER-17  | b                                              | [15, 58]  |
|           | Hawaii                      | 2008      | 145.9                                  | SEER-17  | b                                              | [15, 58]  |
|           | Iowa                        | 2008      | 134.8                                  | SEER-17  | b                                              | [15, 58]  |
|           | Kentucky                    | 2008      | 144.7                                  | SEER-17  | b                                              | [15, 58]  |
|           | Los Angeles                 | 2008      | 135.3                                  | SEER-17  | b                                              | [15, 58]  |
|           | Louisiana                   | 2008      | 161.5                                  | SEER-17  | b                                              | [15, 58]  |
|           | New Jersey                  | 2008      | 158.3                                  | SEER-17  | b                                              | [15, 58]  |
|           | Rural Georgia               | 2008      | 173.9                                  | SEER-17  | b                                              | [15, 58]  |
|           | San Francisco Bay Area      | 2008      | 152.2                                  | SEER-17  | b                                              | [15, 58]  |
|           | San Jose                    | 2008      | 139.6                                  | SEER-17  | b                                              | [15, 58]  |
|           | SEER-13                     | 1992      | 197.0                                  | SEER-13  | b                                              | [18, 58]  |
|           | SEER-13                     | 1993      | 213.1                                  | SEER-13  | b                                              | [18, 58]  |
|           | SEER-13                     | 1994      | 195.6                                  | SEER-13  | b                                              | [18, 58]  |
|           | SEER-13                     | 1995      | 182.9                                  | SEER-13  | b                                              | [18, 58]  |
|           | SEER-13                     | 1996      | 182.3                                  | SEER-13  | b                                              | [18, 58]  |
|           | SEER-13                     | 1997      | 184.2                                  | SEER-13  | b                                              | [18, 58]  |
|           | SEER-13                     | 1998      | 187.3                                  | SEER-13  | b                                              | [18, 58]  |
|           | SEER-13                     | 1999      | 194.3                                  | SEER-13  | b                                              | [18, 58]  |
|           | SEER-13                     | 2000      | 196.4                                  | SEER-13  | b                                              | [1, 13]   |
|           | SEER-13                     | 2001      | 186.0                                  | SEER-13  | b                                              | [1, 13]   |

| Region | Location | Year(s) | Age-Standardized Incidence per 100,000 | Source  | Population of African Descent (%) <sup>a</sup> | Reference |
|--------|----------|---------|----------------------------------------|---------|------------------------------------------------|-----------|
|        | SEER-13  | 2002    | 191.4                                  | SEER-13 | b                                              | 1, 13     |
|        | SEER-13  | 2003    | 174.7                                  | SEER-13 | b                                              | 1, 13     |
|        | SEER-13  | 2004    | 171.6                                  | SEER-13 | b                                              | 1, 13     |
|        | SEER-13  | 2005    | 163.4                                  | SEER-13 | b                                              | 1, 13     |
|        | SEER-13  | 2006    | 165.7                                  | SEER-13 | b                                              | 1, 13     |
|        | SEER-13  | 2007    | 175.6                                  | SEER-13 | b                                              | 1, 13     |
|        | SEER-13  | 2008    | 163.8                                  | SEER-13 | b                                              | 1, 13     |

<sup>a</sup> Includes men defined as African descent, including those defined as having some non-African ancestry, including creole, mestizo, mulatto and related groups. Percentages denoted as “greater than” indicate that the non-African percentages include African or mixed-African background individuals. NA: Data not available. Source: *The World Factbook 2009*. Washington, DC: Central Intelligence Agency, 2009.

<sup>b</sup> Data refer only to African descent population

**Supplementary Table 2: CaP Incidence Data in Men of African Descent Outside the US Derived from the Literature that were Excluded From Consideration Due to Lack of Sampling Frame, Unclear Reference Population, Lack of Age-Standardization, or Other Data Limitations.**

| <b>Region</b> | <b>Location</b>             | <b>Year(s)</b> | <b>Adjusted Incidence per 100,000</b> | <b>Source</b> | <b>Age-Standardization</b> | <b>Reference</b> |
|---------------|-----------------------------|----------------|---------------------------------------|---------------|----------------------------|------------------|
| Africa        | East Africa                 | 1975           | 5.5                                   | Population    | Crude                      | [59]             |
|               | Central Africa              | 1975           | 6.0                                   | Population    | Crude                      | [59]             |
|               | South Africa                | 1975           | 8.0                                   | Population    | Crude                      | [59]             |
|               | West Africa                 | 1975           | 3.0                                   | Population    | Crude                      | [59]             |
|               | Congo (Brazzaville)         | 1996-1999      | 6.4                                   | Hospital      | World                      | [60]             |
|               | Cameroon                    | 1986-1990      | 93.8                                  | Hospital      | Crude                      | [61]             |
|               | Gambia                      | 1997-1998      | 4.7                                   | Registry      | World                      | [62]             |
|               | Gambia                      | 1988-1997      | 2.5                                   | Registry      | World                      | [62]             |
|               | Guinea-Conakry              | 1992-1994      | 8.1                                   | Registry      | World                      | [63]             |
|               | Guinea-Conakry              | 1996-1999      | 9.7                                   | Registry      | World                      | [63]             |
|               | Ivory Coast (Abidjan)       | 1995-1997      | 31.4                                  | Registry      | World                      | [64]             |
|               | Kenya (Eldoret)             | 1998-2000      | 16.8                                  | Registry      | World                      | [60]             |
|               | Mali (Bamako)               | 1987-1988      | 4.7                                   | Registry      | World                      | [65]             |
|               | Malawi (Blantyre)           | 1994-1998      | 5.9                                   | Registry      | World                      | [66]             |
|               | Malawi (Blantyre)           | 2000-2001      | 10.7                                  | Registry      | World                      | [66]             |
|               | Namibia                     | 1995-1998      | 21.8                                  | Registry      | World                      | [60]             |
|               | Niger (Niamey)              | 1993-1999      | 10.8                                  | Registry      | World                      | [60]             |
|               | Nigeria (Midwestern)        | 2008-2009      | 7.9                                   | Registry      | World                      | [67]             |
|               | Nigeria (Southwestern)      | 2002-2004      | 182.5                                 | Hospital      | Crude                      | [68]             |
|               | Nigeria                     | 1984-1994      | 61.3                                  | Hospital      | Crude                      | [69]             |
|               | Nigeria                     | 1988-1993      | 127.0                                 | Hospital      | Crude                      | [6]              |
|               | Nigeria (Ibadan)            | 1998-1999      | 19.8                                  | Registry      | World                      | [60]             |
|               | Nigeria (Port Harcourt)     | 1985-1998      | 114.0                                 | Hospital      | Crude                      | [70]             |
|               | South Africa                | 1988           | 14.4                                  | Registry      | World                      | [71]             |
|               | South Africa                | 1989-1992      | 14.3                                  | Registry      | World                      | [60]             |
|               | South Africa (Eastern Cape) | 1998-2002      | 4.4                                   | Registry      | World                      | [72]             |
|               | Swaziland                   | 1996-1999      | 21.5                                  | Registry      | World                      | [60]             |
|               | Transkei Umtata             | 1996-1998      | 3.7                                   | Registry      | World                      | [60]             |
|               | Uganda (Kyadondo)           | 1960-1966      | 3.1                                   | Registry      | Crude                      | [55]             |
|               | Uganda (Kyadondo)           | 1967-1971      | 6.8                                   | Registry      | Crude                      | [55]             |
| Caribbean     | Bahamas                     | 2009           | 228.0                                 | Registry      | Bahamas                    |                  |
|               | Bermuda                     | 2000-2003      | 325.1                                 | Registry      | USA                        | [73]             |
|               | Caribbean                   | 1975           | 19.0                                  | Population    | Crude                      | [59]             |
|               | Guadeloupe                  | 1995           | 92.5                                  | Pathology     | World                      | [74]             |
|               | Guadeloupe                  | 1996           | 93.3                                  | Pathology     | World                      | [74]             |
|               | Guadeloupe                  | 1997           | 91.3                                  | Pathology     | World                      | [74]             |
|               | Guadeloupe                  | 1998           | 91.3                                  | Pathology     | World                      | [74]             |
| Guadeloupe    | 1999                        | 88.8           | Pathology                             | World         | [74]                       |                  |

| <b>Region</b> | <b>Location</b>                   | <b>Year(s)</b> | <b>Adjusted Incidence per 100,000</b> | <b>Source</b>                        | <b>Age-Standardization</b> | <b>Reference</b> |
|---------------|-----------------------------------|----------------|---------------------------------------|--------------------------------------|----------------------------|------------------|
|               | Guadeloupe                        | 2000           | 100.9                                 | Pathology                            | World                      | [74]             |
|               | Guadeloupe                        | 2001           | 107.9                                 | Pathology                            | World                      | [74]             |
|               | Guadeloupe                        | 2002           | 152.3                                 | Pathology                            | World                      | [74]             |
|               | Jamaica (Kingston and St. Andrew) | 1995           | 56.4                                  | Registry                             | World                      | [75]             |
|               | Jamaica (Kingston)                | 1989-1993      | 304.0                                 | Registry/<br>Clinic                  | USA                        | [76]             |
| UK            | UK-Caribbean                      | 1995-2001      | 165.5                                 | Clinical Cohort                      | Europe                     | [77]             |
|               | UK-African                        | 1995-2001      | 139.3                                 | Clinical Cohort                      | Europe                     | [77]             |
|               | UK                                | 1999-2000      | 647.0                                 | Medical Databases, Regional Registry | Europe                     | [78]             |
